# Supplementary material
Source: Springer Nature journal article supplement (https://www.springermedizin.de/resource/supplementary/12888_2012_1318_MOESM8_ESM.pdf/9479788)

# Restrained eating disorders

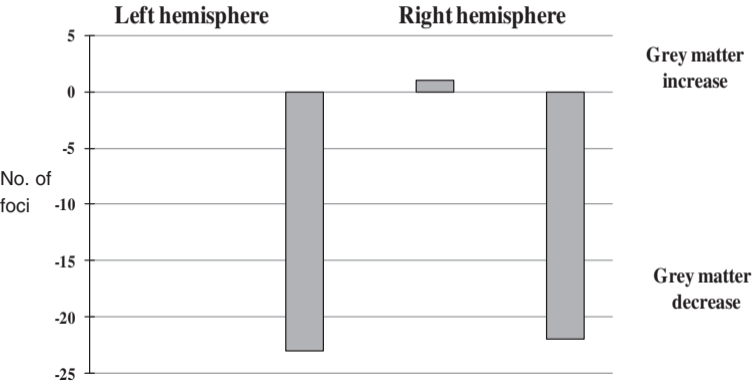

Supplement: MOESM8 [file 9479788]
